# Supplementary material
Source: PubMed Central journal article supplement (PMC4533933)
Supplement: NIHMS628934-supplement-Supplementary_Material.pdf [file NIHMS628934-supplement-Supplementary_Material.pdf]

# Supplementary Material to A Two-Sample Test for Equality of Means in High Dimension

## S.1 Complete Proof of Lemma 1 of the Main Paper

**Lemma 1** *Let  $X_{1j}, \dots, X_{nj}$  and  $Y_{1j}, \dots, Y_{mj}$  be independent identically distributed random samples with  $\text{Var}(X_{1j}) = \sigma_{1j}^2$  and  $\text{Var}(Y_{1j}) = \sigma_{2j}^2$  and  $EX_{1j} = EY_{1j}$  for all  $j = 1, \dots, p$ . Assume that  $\max\{E|X_{1j}|^{16}, E|Y_{1j}|^{16}, j = 1, \dots, p\} = O(1)$  and that  $\min\{\sigma_{1j}^2, \sigma_{2j}^2\} > c > 0$ . Let*

$$t_{nj}^2 = n(\bar{X}_{nj} - \bar{Y}_{mj})^2 \{s_{nj}^2 + (n/m)\vartheta_{mj}^2\}^{-1}$$

where  $s_n^2$  and  $\vartheta_m^2$  are the two sample variances and let  $m \sim n$  as  $n \rightarrow \infty$ . Then  $E(t_{nj}^2) = 1 + n^{-1}c_{nj} + n^{-2}d_{nj} + O(n^{-3})$  for

$$c_{nj} = \tau_{nj}^{-2} \{\sigma_{1j}^2 + (n/m)^2 \sigma_{2j}^2\} + 2\tau_{nj}^{-6} \{\mu'_{3j} + (n/m)^2 \eta'_{3j}\}^2 \quad (\text{S.1})$$

and

$$\begin{aligned} d_{nj} = & \tau_{nj}^{-4} [\{\sigma_{1j}^2 + (n/m)^2 \sigma_{2j}^2\} - \{(\mu'_{4j} - 3\sigma_{1j}^4) + (n/m)^4 (\eta'_{4j} - 3\sigma_{2j}^4)\}] \\ & + \tau_{nj}^{-6} \{\sigma_{1j}^2 + (n/m)^2 \sigma_{2j}^2\} \{(\mu'_{4j} - \sigma_{1j}^4) + (n/m)^3 (\eta'_{4j} - \sigma_{2j}^4)\} \\ & - 4\tau_{nj}^{-6} \{\mu'_{3j} + (n/m)^2 \eta'_{3j}\} \{\mu'_{3j} + (n/m)^3 \eta'_{3j}\} \\ & - 2\tau_{nj}^{-6} \{(\mu'_{3j})^2 + (n/m)^5 (\eta'_{3j})^2\} \\ & - 6\tau_{nj}^{-8} \{\mu'_{3j} + (n/m)^2 \eta'_{3j}\} \{\mu'_{5j} - 2\mu'_{3j}\sigma_{1j}^2 + (n/m)^4 (\eta'_{5j} - 2\eta'_{3j}\sigma_{2j}^2)\} \\ & - 3\tau_{nj}^{-8} \{(\mu'_{4j} - \sigma_{1j}^4) + (n/m)^3 (\eta'_{4j} - \sigma_{2j}^4)\}^2 \\ & + 6\tau_{nj}^{-8} \{\sigma_{1j}^2 + (n/m)^2 \sigma_{2j}^2\} \{\mu'_{3j} + (n/m)^2 \eta'_{3j}\}^2 \\ & + 3\tau_{nj}^{-10} \{\sigma_{1j}^2 + (n/m)^2 \sigma_{2j}^2\} \{(\mu'_{4j} - \sigma_{1j}^4) + (n/m)^3 (\eta'_{4j} - \sigma_{2j}^4)\}^2 \\ & + 12\tau_{nj}^{-10} \{\mu'_{3j} + (n/m)^2 \eta'_{3j}\}^2 \{(\mu'_{4j} - \sigma_{1j}^4) + (n/m)^3 (\eta'_{4j} - \sigma_{2j}^4)\}, \end{aligned} \quad (\text{S.2})$$

where  $\tau_{nj}^2 = \{\sigma_{1j}^2 + (n/m)\sigma_{2j}^2\}$  and  $\mu'_{kj}$  and  $\eta'_{kj}$  are the  $k$ th central moments of  $X_{1j}$  and  $Y_{1j}$ , respectively.

**Proof 1 (Expanded Proof of Lemma 1)** *For ease of syntax, ignore the subscript  $j$ , and, without loss of generality, assume that  $EX_{1j} = EY_{1j} = 0$ . Let  $\Delta_n = s_n^2 - \sigma_1^2 + (n/m)(\vartheta_m^2 - \sigma_2^2)$*

and let  $t_n^2$  be approximated by the expansion

$$\tilde{t}_n^2 = n(\bar{X}_n - \bar{Y}_m)^2(\tau_n^{-2} - \tau_n^{-4}\Delta_n + \tau_n^{-6}\Delta_n^2 - \tau_n^{-8}\Delta_n^3 + \tau_n^{-10}\Delta_n^4) \quad (\text{S.3})$$

so that  $t_n^2 = \tilde{t}_n^2 + O_p(n^{-3})$ . An expression for the expected value  $E(\tilde{t}_{nj}^2)$  would thus involve the quantities  $n\tau_n^{-2k}E(\bar{X}_n - \bar{Y}_m)^2\Delta_n^{k-1}$  for  $k = 1, \dots, 5$ . These expectations must be computed such that they retain terms out to the order of  $O(n^{-3})$ .

Let  $\chi_{|B|}(\{X_j : j \in B\})$  represent the joint cumulant of the random variables in the set  $\{X_j : j \in B\}$ , where  $|B|$  is the cardinality of  $B$ . Then the formula

$$E(X_1 \dots X_k) = \Sigma_\pi \Pi_{B \in \pi} \chi_{|B|}(\{X_j : j \in B\}) \quad (\text{S.4})$$

from Leonov & Shiryayev (1959) gives the expected value of a product of random variables in terms of joint cumulants, where  $\Sigma_\pi$  denotes summation over all possible partitions of  $\{X_1, \dots, X_k\}$ , and  $\Pi_{B \in \pi}$  denotes the product over all cells of the partition  $\pi$ . Using (S.4) to compute  $E(\bar{X}_n - \bar{Y}_m)^2\Delta_n^{k-1}$  to within  $O(n^{-4})$  of their true values for  $k = 1, \dots, 5$  involves the joint cumulants tabulated below, where  $\Delta \equiv \Delta_n$ ,  $\bar{X} \equiv \bar{X}_n$ , and  $\bar{Y} \equiv \bar{Y}_m$ .

|   | 0                                | 1                                                   | 2                                                                      |
|---|----------------------------------|-----------------------------------------------------|------------------------------------------------------------------------|
| 0 |                                  | $\chi_1(\bar{X} - \bar{Y})$                         | $\chi_2(\bar{X} - \bar{Y}, \bar{X} - \bar{Y})$                         |
| 1 | $\chi_1(\Delta)$                 | $\chi_2(\Delta, \bar{X} - \bar{Y})$                 | $\chi_3(\Delta, \bar{X} - \bar{Y}, \bar{X} - \bar{Y})$                 |
| 2 | $\chi_2(\Delta, \Delta)$         | $\chi_3(\Delta, \Delta, \bar{X} - \bar{Y})$         | $\chi_4(\Delta, \Delta, \bar{X} - \bar{Y}, \bar{X} - \bar{Y})$         |
| 3 | $\chi_3(\Delta, \Delta, \Delta)$ | $\chi_4(\Delta, \Delta, \Delta, \bar{X} - \bar{Y})$ | $\chi_5(\Delta, \Delta, \Delta, \bar{X} - \bar{Y}, \bar{X} - \bar{Y})$ |

If  $\kappa(i, j)$  denotes the  $ij$ th member of the table of joint cumulants, then (A.6) gives

$$E(\bar{X} - \bar{Y})^2 = \kappa(0, 2) + O(n^{-4}) \quad (\text{S.5})$$

$$E(\bar{X} - \bar{Y})^2\Delta = \kappa(1, 2) + \kappa(0, 2)\kappa(1, 0) + O(n^{-4}) \quad (\text{S.6})$$

$$\begin{aligned} E(\bar{X} - \bar{Y})^2\Delta^2 &= \kappa(2, 2) + 2\kappa(1, 0)\kappa(1, 2) + \kappa(0, 2)\kappa(2, 0) \\ &\quad + 2\kappa^2(1, 1) + \kappa(0, 2)\kappa^2(1, 0) + O(n^{-4}) \end{aligned} \quad (\text{S.7})$$

$$\begin{aligned} E(\bar{X} - \bar{Y})^2\Delta^3 &= \kappa(0, 2)\kappa(3, 0) + 6\kappa(1, 1)\kappa(2, 1) \\ &\quad + 3\kappa(2, 0)\kappa(1, 2) + 3\kappa(1, 0)\kappa(2, 0)\kappa(0, 2) \\ &\quad + 6\kappa(1, 0)\kappa^2(1, 1) + O(n^{-4}) \end{aligned} \quad (\text{S.8})$$

$$E(\bar{X} - \bar{Y})^2\Delta^4 = 3\kappa(0, 2)\kappa^2(2, 0) + 12\kappa^2(1, 1)\kappa(2, 0) + O(n^{-4}) \quad (\text{S.9})$$

after removing cumulant products of order smaller than  $O(n^{-4})$  and noting that  $\kappa(0,1) = 0$ . Each cumulant is simplified using rules found in Brillinger (1981), and the formula

$$\chi_k(X_1, \dots, X_k) = \sum_{\pi} (-1)^{(|\pi|-1)} (|\pi|-1)! \prod_{B \in \pi} E(\prod_{i \in B} X_i) \quad (\text{S.10})$$

from Leonov & Shiryaev (1959) provides expressions for the simplified cumulants in terms of moments. The cumulants are computed below, where each cumulant is either given exactly, or is approximated to the order necessary for the cumulant products in (S.5)–(S.9) to lie within  $O(n^{-4})$  of their true values.

$$\begin{aligned}
\kappa(0, 1) &= \chi_1(\bar{X} - \bar{Y}) = E(\bar{X} - \bar{Y}) = 0 \\
\kappa(0, 2) &= \chi_2(\bar{X} - \bar{Y}, \bar{X} - \bar{Y}) = E(\bar{X} - \bar{Y})^2 - \{E(\bar{X} - \bar{Y})\}^2 \\
&= n^{-1}\{\sigma_1^2 + (n/m)\sigma_2^2\} \\
\kappa(1, 0) &= \chi_1(\Delta) = E\{(s^2 - \sigma_1^2) + (n/m)(\vartheta^2 - \sigma_2^2)\} = -\{\sigma_1^2/n - (n/m)\sigma_2^2/m\} \\
&= -n^{-1}\{\sigma_1^2 + (n/m)^2\sigma_2^2\} \\
\kappa(1, 1) &= \chi_2(\Delta, \bar{X} - \bar{Y}) = \chi_2(\bar{X}^2 - \bar{X}^2, \bar{X}) + (n/m)\chi_2(\bar{Y}^2 - \bar{Y}^2, \bar{Y}) \\
&= \chi_2(\bar{X}^2, \bar{X}) - \chi_2(\bar{X}^2, \bar{X}) + (n/m)\chi_2(\bar{Y}^2 - \bar{Y}^2, \bar{Y}) \\
&= n^{-1}\chi_2(X_1^2, X_1) - n^{-3}\chi_2(\Sigma_i X_i^2 + \Sigma_{i \neq j} X_i X_j, \Sigma_i X_i) + (n/m)\chi_2(\bar{Y}^2 - \bar{Y}^2, \bar{Y}) \\
&= n^{-1}\mu'_3 - n^{-2}\chi_2(X_1^2 + X_1 \Sigma_{j=2}^n X_j, X_1) + (n/m)\chi_2(\bar{Y}^2 - \bar{Y}^2, \bar{Y}) \\
&= (n^{-1} - n^{-2})\mu'_3 + n^{-2}(n-1)\chi_2(X_1 X_2, X_1) + (n/m)\chi_2(\bar{Y}^2 - \bar{Y}^2, \bar{Y}) \\
&= (n^{-1} - n^{-2})\mu'_3 + (n/m)(m^{-1} - m^{-2})\eta'_3 \\
\kappa(1, 2) &= \chi_3(\Delta, \bar{X} - \bar{Y}, \bar{X} - \bar{Y}) = \chi_3(\bar{X}^2 - \bar{X}^2, \bar{X}, \bar{X}) + (n/m)\chi_3(\bar{Y}^2 - \bar{Y}^2, \bar{Y}, \bar{Y}) \\
&= n^{-2}\chi_3(X_1^2, X_1, X_1) - n^{-3}\chi_3(X_1^2, X_1, X_1) - n^{-4}\chi_3(\Sigma_i X_i X_j, \Sigma_i X_i, \Sigma_i X_i) \\
&\quad + (n/m)\chi_3(\bar{Y}^2 - \bar{Y}^2, \bar{Y}, \bar{Y}) \\
&= (n^{-2} - n^{-3})(\mu'_4 - \sigma_1^4) + (n/m)(m^{-2} - m^{-3})(\eta'_4 - \sigma_2^4) \\
\kappa(2, 0) &= \chi_2(\Delta, \Delta) = \chi_2(\bar{X}^2 - \bar{X}^2, \bar{X}^2 - \bar{X}^2) + (n/m)^2\chi_2(\bar{Y}^2 - \bar{Y}^2, \bar{Y}^2 - \bar{Y}^2) \\
&= \chi_2(\bar{X}^2, \bar{X}^2) - 2\chi_2(\bar{X}^2, \bar{X}^2) + (\bar{X}^2, \bar{X}^2) + (n/m)^2\chi_2(\bar{Y}^2 - \bar{Y}^2, \bar{Y}^2 - \bar{Y}^2) \\
&= n^{-1}\chi_2(X_1^2, X_1^2) - 2n^{-3}\{\chi_2(\Sigma_i X_i^2, \Sigma_i X_i^2) + \chi_2(\Sigma_{i \neq j} X_i X_j, \Sigma_i X_i^2)\} \\
&\quad + n^{-4}\{\chi_2(\Sigma_i X_i^2, \Sigma_i X_i^2) - 2\chi_2(\Sigma_{i \neq j} X_i X_j, \Sigma_i X_i^2) + \chi_2(\Sigma_{i \neq j} X_i X_j, \Sigma_{i \neq j} X_i X_j)\} \\
&\quad + (n/m)^2\chi_2(\bar{Y}^2 - \bar{Y}^2, \bar{Y}^2 - \bar{Y}^2) \\
&= (n^{-1} - 2n^{-2} + n^{-3})(\mu'_4 - \sigma_1^4) + n^{-4}\chi_2(\Sigma_{i \neq j} X_i X_j, \Sigma_{i \neq j} X_i X_j) \\
&\quad + (n/m)^2\chi_2(\bar{Y}^2 - \bar{Y}^2, \bar{Y}^2 - \bar{Y}^2) \\
&= (n^{-1} - 2n^{-2} + n^{-3})(\mu'_4 - \sigma_1^4) + \frac{2(n-1)}{n^3}\sigma_1^4 + (n/m)^2\chi_2(\bar{Y}^2 - \bar{Y}^2, \bar{Y}^2 - \bar{Y}^2) \\
&= n^{-3}(n-1)^2\mu'_4 - n^{-3}(n-1)(n-3)\sigma_1^4 \\
&\quad + (n/m)^2\{m^{-3}(m-1)^2\eta'_4 - m^{-3}(m-1)(m-3)\sigma_2^4\} \\
&= (n^{-1} - 2n^{-2})\mu'_4 - (n^{-1} - 4n^{-2})\sigma_1^4 \\
&\quad + (n/m)^2\{(m^{-1} - 2m^{-2})\eta'_4 - (m^{-1} - 4m^{-2})\sigma_2^4\} + O(n^{-3})
\end{aligned}$$

$$\begin{aligned}
\kappa(2, 1) &= \chi_3(\Delta, \Delta, \bar{X} - \bar{Y}) \\
&= \chi_3(\bar{X}^2 - \bar{X}^2, \bar{X}^2 - \bar{X}^2, \bar{X}) + (n/m)^2 \chi_3(\bar{Y}^2 - \bar{Y}^2, \bar{Y}^2 - \bar{Y}^2, \bar{Y}) \\
&= \chi_3(\bar{X}^2, \bar{X}^2, \bar{X}) + (n/m)^2 \chi_3(\bar{Y}^2, \bar{Y}^2, \bar{Y}) + O(n^{-3}) \\
&= n^{-2} \chi_3(X_1^2, X_1^2, X_1) + (n/m)^2 m^{-2} \chi_3(Y_1^2, Y_1^2, Y_1) + O(n^{-3}) \\
&= n^{-2} (\mu'_5 - 2\mu'_3 \sigma_1^2) + (n/m)^2 m^{-2} (\eta'_5 - 2\eta'_3 \sigma_2^2) + O(n^{-3}) \\
&= n^{-2} \{ (\mu'_5 - 2\mu'_3 \sigma_1^2) + (n/m)^4 (\eta'_5 - 2\eta'_3 \sigma_2^2) \} + O(n^{-3}) \\
\kappa(2, 2) &= \chi_4(\Delta, \Delta, \bar{X} - \bar{Y}, \bar{X} - \bar{Y}) \\
&= \chi_4(\bar{X}^2 - \bar{X}^2, \bar{X}^2 - \bar{X}^2, \bar{X}, \bar{X}) + (n/m)^2 \chi_4(\bar{Y}^2 - \bar{Y}^2, \bar{Y}^2 - \bar{Y}^2, \bar{Y}, \bar{Y}) \\
&= n^{-3} \chi_4(X_1^2, X_1^2, X_1, X_1) + (n/m)^2 m^{-3} \chi_4(Y_1^2, Y_1^2, Y_1, Y_1) + O(n^{-4}) \\
&= n^{-3} [\mu'_6 - 3\sigma_1^2 \mu'_4 - 2(\mu'_3)^2 + 2\sigma_1^6 + (n/m)^5 \{ \eta'_6 - 3\sigma_2^2 \eta'_4 - 2(\eta'_3)^2 + 2\sigma_2^6 \}] + O(n^{-3}) \\
\kappa(3, 0) &= \chi_3(\Delta, \Delta, \Delta) = \chi_3(\bar{X}^2 - \bar{X}^2, \bar{X}^2 - \bar{X}^2, \bar{X}^2 - \bar{X}^2) \\
&\quad + (n/m)^3 \chi_3(\bar{Y}^2 - \bar{Y}^2, \bar{Y}^2 - \bar{Y}^2, \bar{Y}^2 - \bar{Y}^2) \\
&= \chi_3(\bar{X}^2, \bar{X}^2, \bar{X}^2) - 3\chi_3(\bar{X}^2, \bar{X}^2, \bar{X}^2) \\
&\quad + 3\chi_3(\bar{X}^2, \bar{X}^2, \bar{X}^2) + \chi_3(\bar{X}^2, \bar{X}^2, \bar{X}^2) \\
&\quad + (n/m)^3 \chi_3(\bar{Y}^2 - \bar{Y}^2, \bar{Y}^2 - \bar{Y}^2, \bar{Y}^2 - \bar{Y}^2) \\
&= n^{-2} \chi_3(X_1^2, X_1^2, X_1^2) \\
&\quad + (n/m)^3 \chi_3(\bar{Y}^2 - \bar{Y}^2, \bar{Y}^2 - \bar{Y}^2, \bar{Y}^2 - \bar{Y}^2) + O(n^{-3}) \\
&= n^{-2} \{ (\mu'_6 - 3\sigma_1^2 \mu'_4 + 2\sigma_1^6) + (n/m)^5 (\eta'_6 - 3\sigma_2^2 \eta'_4 + 2\sigma_2^6) \} + O(n^{-3}) \\
\kappa(3, 2) &= \chi_5(\Delta, \Delta, \Delta, \bar{X} - \bar{Y}, \bar{X} - \bar{Y}) = O(n^{-4})
\end{aligned}$$

Plugging the above expressions into (S.5)–(S.9) and dropping terms of smaller order than  $O(n^{-3})$  yields

$$\begin{aligned}
n\tau_n^{-2}E(\bar{X}_n - \bar{Y}_m)^2 &= 1 \\
n\tau_n^{-4}E(\bar{X}_n - \bar{Y}_m)^2\Delta_n &= n^{-1}\tau_n^{-4}[(\mu'_4 - \sigma_1^4) + (n/m)^3(\eta'_4 - \sigma_2^4)] \\
&\quad - n^{-1}\tau_n^{-2}[\sigma_1^2 + (n/m)^2\sigma_2^2] \\
&\quad - n^{-2}\tau_n^{-4}[(\mu'_4 - \sigma_1^4) + (n/m)^4(\eta'_4 - \sigma_2^4)] \\
n\tau_{m,n}^{-6}E(\bar{X}_n - \bar{Y}_m)^2\Delta_n^2 &= n^{-1}\tau_n^{-4}[(\mu'_4 - \sigma_1^4) + (n/m)^3(\eta'_4 - \sigma_2^4)] \\
&\quad + n^{-2}\tau_n^{-4}[\sigma_1^2 + (n/m)^2\sigma_2^2]^2 \\
&\quad - n^{-2}\tau_n^{-4}[(2\mu'_4 - 4\sigma_1^4) + (n/m)^4(2\eta'_4 - 4\sigma_1^4)] \\
&\quad + 2n^{-1}\tau_n^{-6}[\mu'_3 + (n/m)^2\eta'_3]^2 \\
&\quad - 4n^{-2}\tau_n^{-6}[\mu'_3 + (n/m)^2\eta'_3][\mu'_3 + (n/m)^3\eta'_3] \\
&\quad - 2n^{-2}\tau_n^{-6}[\sigma_1^2 + (n/m)^2\sigma_2^2][(\mu'_4 - \sigma_1^4) + (n/m)^3(\eta'_4 - \sigma_2^4)] \\
&\quad + n^{-2}\tau_n^{-6}[\mu'_6 - 3\sigma_1^2\mu'_4 - 2(\mu'_3)^2 + 2\sigma_1^6] \\
&\quad + n^{-2}\tau_n^{-6}(n/m)^5[\eta'_6 - 3\sigma_2^2\eta'_4 - 2(\eta'_3)^2 + 2\sigma_2^6] \\
&\quad + O(n^{-3}) \\
n\tau_n^{-8}E(\bar{X}_n - \bar{Y}_m)^2\Delta_n^3 &= n^{-2}\tau_n^{-6}[\mu'_6 - 3\sigma_1^2\mu'_4 + 2\sigma_1^6 + (n/m)^5(\eta'_6 - 3\sigma_2^2\eta'_4 + 2\sigma_2^6)] \\
&\quad - 3n^{-2}\tau_n^{-6}[\sigma_1^2 + (n/m)^2\sigma_2^2][(\mu'_4 - \sigma_1^4) + (n/m)^3(\eta'_4 - \sigma_2^4)] \\
&\quad + 6n^{-2}\tau_n^{-8}[\mu'_3 + (n/m)^2\eta'_3][(\mu'_5 - 2\mu'_3\sigma_1^2) + (n/m)^4(\eta'_5 - 2\eta'_3\sigma_2^2)] \\
&\quad + 3n^{-2}\tau_n^{-8}[(\mu'_4 - \sigma_1^4) + (n/m)^3(\eta'_4 - \sigma_2^4)]^2 \\
&\quad - 6n^{-2}\tau_n^{-8}[\sigma_1^2 + (n/m)^2\sigma_2^2][\mu'_3 + (n/m)^2\eta'_3]^2 \\
&\quad + O(n^{-3}) \\
n\tau_n^{-10}E(\bar{X}_n - \bar{Y}_m)^2\Delta_n^4 &= 3n^{-2}\tau_n^{-10}[\sigma_1^2 + (n/m)\sigma_2^2][(\mu'_4 - \sigma_1^4) + (n/m)^3(\eta'_4 - \sigma_2^4)]^2 \\
&\quad + 12n^{-2}\tau_n^{-10}[\mu'_3 + (n/m)^2\eta'_3]^2[(\mu'_4 - \sigma_1^4) + (n/m)^3(\eta'_4 - \sigma_2^4)] \\
&\quad + O(n^{-3})
\end{aligned}$$

Adding and subtracting these quantities according to the expansion in (S.3) and gathering terms out of which  $n^{-1}$  and  $n^{-2}$  can be factored yields  $c_n$  from (S.1) and  $d_n$  from (S.2), respectively, thus completing the proof.

## S.2 Additional Simulation Output

| $p = 300, \Sigma_1 = \Sigma_2$               |     |      |      |      |      | Normal(0, 1) Innovations |        |        |                  |        |        |      |
|----------------------------------------------|-----|------|------|------|------|--------------------------|--------|--------|------------------|--------|--------|------|
| $\widehat{\xi}_n \equiv 1$                   |     |      |      |      |      | Parzen Window            |        |        | Trapezoid Window |        |        |      |
| n                                            | m   | Cov  | Ch-Q | SK   | CLX  | L = 10                   | L = 15 | L = 20 | L = 10           | L = 15 | L = 20 |      |
| 45                                           | 60  | IND  | 0.07 | 0.04 | 0.09 | 0.06                     | 0.07   | 0.07   | 0.06             | 0.08   | 0.07   |      |
|                                              |     | ARMA | 0.06 | 0.04 | 0.08 | 0.06                     | 0.07   | 0.07   | 0.07             | 0.08   | 0.07   |      |
|                                              |     | LR   | 0.05 | 0.04 | 0.10 | 0.06                     | 0.06   | 0.07   | 0.08             | 0.09   | 0.07   |      |
| 90                                           | 120 | IND  | 0.05 | 0.04 | 0.07 | 0.06                     | 0.06   | 0.06   | 0.07             | 0.08   | 0.06   |      |
|                                              |     | ARMA | 0.05 | 0.04 | 0.06 | 0.07                     | 0.07   | 0.08   | 0.08             | 0.09   | 0.08   |      |
|                                              |     | LR   | 0.03 | 0.03 | 0.07 | 0.05                     | 0.05   | 0.07   | 0.06             | 0.08   | 0.07   |      |
| $\widehat{\xi}_n \equiv 1 + a_n/n + b_n/n^2$ |     |      |      |      |      | Parzen Window            |        |        | Trapezoid Window |        |        |      |
| n                                            | m   | Cov  | Ch-Q | SK   | CLX  | L = 10                   | L = 15 | L = 20 | L = 10           | L = 15 | L = 20 |      |
| 45                                           | 60  | IND  | 0.07 | 0.04 | 0.09 | 0.07                     | 0.07   | 0.07   | 0.07             | 0.07   | 0.08   | 0.07 |
|                                              |     | ARMA | 0.06 | 0.04 | 0.08 | 0.07                     | 0.07   | 0.07   | 0.07             | 0.08   | 0.07   |      |
|                                              |     | LR   | 0.05 | 0.04 | 0.10 | 0.07                     | 0.07   | 0.08   | 0.08             | 0.09   | 0.08   |      |
| 90                                           | 120 | IND  | 0.05 | 0.04 | 0.07 | 0.06                     | 0.06   | 0.07   | 0.07             | 0.08   | 0.07   |      |
|                                              |     | ARMA | 0.05 | 0.04 | 0.06 | 0.08                     | 0.08   | 0.08   | 0.08             | 0.09   | 0.08   |      |
|                                              |     | LR   | 0.03 | 0.03 | 0.07 | 0.06                     | 0.06   | 0.06   | 0.07             | 0.09   | 0.06   |      |

Table S.1: Type I error rates over  $S = 500$  simulations with nominal size  $\alpha = .05$  for the moderate- and large- $p$  GCT under the Parzen and trapezoid lag windows at lengths  $L = 10, 15, 20$  and for the Ch-Q, SK, CLX tests under Normal(0, 1) innovations with  $\Sigma_1 = \Sigma_2$ .

| $p = 300, \Sigma_2 = 2\Sigma_1$              |     |      |      |      |      | Normal(0, 1) Innovations |        |        |                  |        |        |
|----------------------------------------------|-----|------|------|------|------|--------------------------|--------|--------|------------------|--------|--------|
| $\widehat{\xi}_n \equiv 1$                   |     |      |      |      |      | Parzen Window            |        |        | Trapezoid Window |        |        |
| n                                            | m   | Cov  | Ch-Q | SK   | CLX  | L = 10                   | L = 15 | L = 20 | L = 10           | L = 15 | L = 20 |
| 45                                           | 60  | IND  | 0.04 | 0.07 | 0.08 | 0.05                     | 0.05   | 0.06   | 0.05             | 0.08   | 0.06   |
|                                              |     | ARMA | 0.04 | 0.03 | 0.04 | 0.06                     | 0.07   | 0.07   | 0.07             | 0.08   | 0.07   |
|                                              |     | LR   | 0.05 | 0.05 | 0.04 | 0.06                     | 0.06   | 0.07   | 0.08             | 0.09   | 0.07   |
| 90                                           | 120 | IND  | 0.07 | 0.12 | 0.07 | 0.07                     | 0.07   | 0.08   | 0.08             | 0.10   | 0.08   |
|                                              |     | ARMA | 0.05 | 0.05 | 0.04 | 0.07                     | 0.07   | 0.08   | 0.08             | 0.09   | 0.08   |
|                                              |     | LR   | 0.06 | 0.09 | 0.06 | 0.05                     | 0.06   | 0.06   | 0.07             | 0.08   | 0.06   |
| $\widehat{\xi}_n \equiv 1 + a_n/n + b_n/n^2$ |     |      |      |      |      | Parzen Window            |        |        | Trapezoid Window |        |        |
| n                                            | m   | Cov  | Ch-Q | SK   | CLX  | L = 10                   | L = 15 | L = 20 | L = 10           | L = 15 | L = 20 |
| 45                                           | 60  | IND  | 0.04 | 0.07 | 0.08 | 0.05                     | 0.06   | 0.06   | 0.07             | 0.08   | 0.06   |
|                                              |     | ARMA | 0.04 | 0.03 | 0.04 | 0.09                     | 0.09   | 0.09   | 0.08             | 0.09   | 0.09   |
|                                              |     | LR   | 0.05 | 0.05 | 0.04 | 0.06                     | 0.06   | 0.07   | 0.08             | 0.08   | 0.07   |
| 90                                           | 120 | IND  | 0.07 | 0.12 | 0.07 | 0.08                     | 0.08   | 0.08   | 0.08             | 0.11   | 0.08   |
|                                              |     | ARMA | 0.05 | 0.05 | 0.04 | 0.07                     | 0.08   | 0.08   | 0.08             | 0.09   | 0.08   |
|                                              |     | LR   | 0.06 | 0.09 | 0.06 | 0.06                     | 0.06   | 0.07   | 0.08             | 0.09   | 0.07   |

Table S.2: Type I error rates over  $S = 500$  simulations with nominal size  $\alpha = .05$  for the moderate- and large- $p$  GCT under the Parzen and trapezoid lag windows at lengths  $L = 10, 15, 20$  and for the Ch-Q, SK, CLX tests under Normal(0, 1) innovations with  $\Sigma_2 = 2\Sigma_1$ .

| $p = 300, \Sigma_1 = \Sigma_2$ |     |      |      |      |      | Centered Gamma(4, 2) Innovations |        |        |                  |        |        |
|--------------------------------|-----|------|------|------|------|----------------------------------|--------|--------|------------------|--------|--------|
| $\widehat{\xi}_n \equiv 1$     |     |      |      |      |      | Parzen Window                    |        |        | Trapezoid Window |        |        |
| n                              | m   | Cov  | Ch-Q | SK   | CLX  | L = 10                           | L = 15 | L = 20 | L = 10           | L = 15 | L = 20 |
| 45                             | 60  | IND  | 0.05 | 0.03 | 0.11 | 0.05                             | 0.05   | 0.06   | 0.07             | 0.07   | 0.06   |
|                                |     | ARMA | 0.04 | 0.03 | 0.06 | 0.07                             | 0.07   | 0.08   | 0.08             | 0.09   | 0.08   |
|                                |     | LR   | 0.04 | 0.01 | 0.08 | 0.06                             | 0.06   | 0.07   | 0.06             | 0.07   | 0.07   |
| 90                             | 120 | IND  | 0.04 | 0.03 | 0.09 | 0.06                             | 0.07   | 0.07   | 0.08             | 0.09   | 0.07   |
|                                |     | ARMA | 0.04 | 0.03 | 0.07 | 0.06                             | 0.06   | 0.06   | 0.06             | 0.07   | 0.06   |
|                                |     | LR   | 0.04 | 0.03 | 0.06 | 0.05                             | 0.05   | 0.05   | 0.06             | 0.07   | 0.05   |

  

| $\widehat{\xi}_n \equiv 1 + a_n/n + b_n/n^2$ |     |      |      |      |      | Parzen Window |        |        | Trapezoid Window |        |        |
|----------------------------------------------|-----|------|------|------|------|---------------|--------|--------|------------------|--------|--------|
| n                                            | m   | Cov  | Ch-Q | SK   | CLX  | L = 10        | L = 15 | L = 20 | L = 10           | L = 15 | L = 20 |
| 45                                           | 60  | IND  | 0.05 | 0.03 | 0.11 | 0.07          | 0.08   | 0.09   | 0.09             | 0.11   | 0.09   |
|                                              |     | ARMA | 0.04 | 0.03 | 0.06 | 0.08          | 0.09   | 0.09   | 0.09             | 0.10   | 0.09   |
|                                              |     | LR   | 0.04 | 0.01 | 0.08 | 0.08          | 0.08   | 0.09   | 0.09             | 0.11   | 0.09   |
| 90                                           | 120 | IND  | 0.04 | 0.03 | 0.09 | 0.08          | 0.09   | 0.09   | 0.10             | 0.11   | 0.09   |
|                                              |     | ARMA | 0.04 | 0.03 | 0.07 | 0.07          | 0.07   | 0.07   | 0.07             | 0.07   | 0.07   |
|                                              |     | LR   | 0.04 | 0.03 | 0.06 | 0.06          | 0.06   | 0.07   | 0.07             | 0.08   | 0.07   |

Table S.3: Type I error rates over  $S = 500$  simulations with nominal size  $\alpha = .05$  for the moderate- and large- $p$  GCT under the Parzen and trapezoid lag windows at lengths  $L = 10, 15, 20$  and for the Ch-Q, SK, CLX tests under centered gamma(4, 2) innovations with  $\Sigma_1 = \Sigma_2$ .

| $p = 300, \Sigma_2 = 2\Sigma_1$ |     |      |      |      |      | Centered Gamma(4, 2) Innovations |        |        |                  |        |        |
|---------------------------------|-----|------|------|------|------|----------------------------------|--------|--------|------------------|--------|--------|
| $\widehat{\xi}_n \equiv 1$      |     |      |      |      |      | Parzen Window                    |        |        | Trapezoid Window |        |        |
| n                               | m   | Cov  | Ch-Q | SK   | CLX  | L = 10                           | L = 15 | L = 20 | L = 10           | L = 15 | L = 20 |
| 45                              | 60  | IND  | 0.05 | 0.06 | 0.06 | 0.06                             | 0.06   | 0.07   | 0.07             | 0.08   | 0.07   |
|                                 |     | ARMA | 0.05 | 0.04 | 0.03 | 0.06                             | 0.07   | 0.07   | 0.07             | 0.07   | 0.07   |
|                                 |     | LR   | 0.04 | 0.07 | 0.04 | 0.05                             | 0.05   | 0.06   | 0.07             | 0.07   | 0.06   |
| 90                              | 120 | IND  | 0.05 | 0.08 | 0.09 | 0.05                             | 0.06   | 0.06   | 0.07             | 0.07   | 0.06   |
|                                 |     | ARMA | 0.05 | 0.05 | 0.04 | 0.06                             | 0.06   | 0.07   | 0.07             | 0.08   | 0.07   |
|                                 |     | LR   | 0.04 | 0.08 | 0.05 | 0.05                             | 0.05   | 0.06   | 0.06             | 0.07   | 0.06   |

  

| $\widehat{\xi}_n \equiv 1 + a_n/n + b_n/n^2$ |     |      |      |      |      | Parzen Window |        |        | Trapezoid Window |        |        |
|----------------------------------------------|-----|------|------|------|------|---------------|--------|--------|------------------|--------|--------|
| n                                            | m   | Cov  | Ch-Q | SK   | CLX  | L = 10        | L = 15 | L = 20 | L = 10           | L = 15 | L = 20 |
| 45                                           | 60  | IND  | 0.05 | 0.06 | 0.06 | 0.08          | 0.09   | 0.09   | 0.09             | 0.11   | 0.09   |
|                                              |     | ARMA | 0.05 | 0.04 | 0.03 | 0.07          | 0.08   | 0.08   | 0.09             | 0.09   | 0.08   |
|                                              |     | LR   | 0.04 | 0.07 | 0.04 | 0.09          | 0.09   | 0.10   | 0.10             | 0.11   | 0.10   |
| 90                                           | 120 | IND  | 0.05 | 0.08 | 0.09 | 0.05          | 0.06   | 0.06   | 0.07             | 0.08   | 0.06   |
|                                              |     | ARMA | 0.05 | 0.05 | 0.04 | 0.08          | 0.08   | 0.08   | 0.07             | 0.09   | 0.08   |
|                                              |     | LR   | 0.04 | 0.08 | 0.05 | 0.08          | 0.08   | 0.08   | 0.09             | 0.09   | 0.08   |

Table S.4: Type I error rates over  $S = 500$  simulations with nominal size  $\alpha = .05$  for the moderate- and large- $p$  GCT under the Parzen and trapezoid lag windows at lengths  $L = 10, 15, 20$  and for the Ch-Q, SK, CLX tests under centered gamma(4, 2) innovations with  $\Sigma_2 = 2\Sigma_1$ .



| $p = 300, \Sigma_1 = \Sigma_2$           |     |      |      |      |      | Double Pareto(16.5, 8) Innovations |        |        |                  |        |        |
|------------------------------------------|-----|------|------|------|------|------------------------------------|--------|--------|------------------|--------|--------|
| $\hat{\xi}_n \equiv 1$                   |     |      |      |      |      | Parzen Window                      |        |        | Trapezoid Window |        |        |
| n                                        | m   | Cov  | Ch-Q | SK   | CLX  | L = 10                             | L = 15 | L = 20 | L = 10           | L = 15 | L = 20 |
| 45                                       | 60  | IND  | 0.04 | 0.02 | 0.10 | 0.05                               | 0.05   | 0.06   | 0.06             | 0.08   | 0.06   |
|                                          |     | ARMA | 0.04 | 0.02 | 0.06 | 0.06                               | 0.07   | 0.07   | 0.08             | 0.08   | 0.07   |
|                                          |     | LR   | 0.04 | 0.03 | 0.07 | 0.06                               | 0.06   | 0.06   | 0.06             | 0.08   | 0.06   |
| 90                                       | 120 | IND  | 0.03 | 0.03 | 0.09 | 0.05                               | 0.06   | 0.06   | 0.06             | 0.07   | 0.06   |
|                                          |     | ARMA | 0.05 | 0.04 | 0.03 | 0.08                               | 0.08   | 0.08   | 0.08             | 0.09   | 0.08   |
|                                          |     | LR   | 0.05 | 0.04 | 0.05 | 0.06                               | 0.06   | 0.06   | 0.07             | 0.08   | 0.06   |
| $\hat{\xi}_n \equiv 1 + a_n/n + b_n/n^2$ |     |      |      |      |      | Parzen Window                      |        |        | Trapezoid Window |        |        |
| n                                        | m   | Cov  | Ch-Q | SK   | CLX  | L = 10                             | L = 15 | L = 20 | L = 10           | L = 15 | L = 20 |
| 45                                       | 60  | IND  | 0.04 | 0.02 | 0.10 | 0.05                               | 0.04   | 0.04   | 0.05             | 0.05   | 0.04   |
|                                          |     | ARMA | 0.04 | 0.02 | 0.06 | 0.09                               | 0.08   | 0.08   | 0.08             | 0.10   | 0.08   |
|                                          |     | LR   | 0.04 | 0.03 | 0.07 | 0.08                               | 0.08   | 0.08   | 0.08             | 0.08   | 0.08   |
| 90                                       | 120 | IND  | 0.03 | 0.03 | 0.09 | 0.05                               | 0.05   | 0.06   | 0.06             | 0.06   | 0.06   |
|                                          |     | ARMA | 0.05 | 0.04 | 0.03 | 0.09                               | 0.09   | 0.09   | 0.09             | 0.09   | 0.09   |
|                                          |     | LR   | 0.05 | 0.04 | 0.05 | 0.06                               | 0.06   | 0.07   | 0.08             | 0.08   | 0.07   |

Table S.5: Type I error rates over  $S = 500$  simulations with nominal size  $\alpha = .05$  for the moderate- and large- $p$  GCT under the Parzen and trapezoid lag windows at lengths  $L = 10, 15, 20$  and for the Ch-Q, SK, CLX tests under double Pareto(16.5, 8) innovations with  $\Sigma_1 = \Sigma_2$ .

| $p = 300, \Sigma_2 = 2\Sigma_1$          |     |      |      |      |      | Double Pareto(16.5, 8) Innovations |        |        |                  |        |        |
|------------------------------------------|-----|------|------|------|------|------------------------------------|--------|--------|------------------|--------|--------|
| $\hat{\xi}_n \equiv 1$                   |     |      |      |      |      | Parzen Window                      |        |        | Trapezoid Window |        |        |
| n                                        | m   | Cov  | Ch-Q | SK   | CLX  | L = 10                             | L = 15 | L = 20 | L = 10           | L = 15 | L = 20 |
| 45                                       | 60  | IND  | 0.04 | 0.06 | 0.07 | 0.06                               | 0.06   | 0.06   | 0.07             | 0.07   | 0.06   |
|                                          |     | ARMA | 0.04 | 0.03 | 0.03 | 0.05                               | 0.05   | 0.05   | 0.06             | 0.07   | 0.05   |
|                                          |     | LR   | 0.05 | 0.04 | 0.06 | 0.06                               | 0.06   | 0.05   | 0.06             | 0.07   | 0.05   |
| 90                                       | 120 | IND  | 0.05 | 0.09 | 0.04 | 0.07                               | 0.07   | 0.07   | 0.07             | 0.08   | 0.07   |
|                                          |     | ARMA | 0.05 | 0.07 | 0.02 | 0.08                               | 0.08   | 0.09   | 0.09             | 0.11   | 0.09   |
|                                          |     | LR   | 0.04 | 0.09 | 0.02 | 0.05                               | 0.06   | 0.06   | 0.06             | 0.08   | 0.06   |
| $\hat{\xi}_n \equiv 1 + a_n/n + b_n/n^2$ |     |      |      |      |      | Parzen Window                      |        |        | Trapezoid Window |        |        |
| n                                        | m   | Cov  | Ch-Q | SK   | CLX  | L = 10                             | L = 15 | L = 20 | L = 10           | L = 15 | L = 20 |
| 45                                       | 60  | IND  | 0.04 | 0.06 | 0.07 | 0.07                               | 0.07   | 0.08   | 0.08             | 0.08   | 0.08   |
|                                          |     | ARMA | 0.04 | 0.03 | 0.03 | 0.07                               | 0.06   | 0.07   | 0.07             | 0.08   | 0.07   |
|                                          |     | LR   | 0.05 | 0.04 | 0.06 | 0.06                               | 0.06   | 0.07   | 0.06             | 0.08   | 0.07   |
| 90                                       | 120 | IND  | 0.05 | 0.09 | 0.04 | 0.07                               | 0.07   | 0.07   | 0.07             | 0.09   | 0.07   |
|                                          |     | ARMA | 0.05 | 0.07 | 0.02 | 0.09                               | 0.10   | 0.10   | 0.10             | 0.12   | 0.10   |
|                                          |     | LR   | 0.04 | 0.09 | 0.02 | 0.06                               | 0.06   | 0.07   | 0.07             | 0.07   | 0.07   |

Table S.6: Type I error rates over  $S = 500$  simulations with nominal size  $\alpha = .05$  for the moderate- and large- $p$  GCT under the Parzen and trapezoid lag windows at lengths  $L = 10, 15, 20$  and for the Ch-Q, SK, CLX tests under double Pareto(16.5, 8) innovations with  $\Sigma_2 = 2\Sigma_1$ .

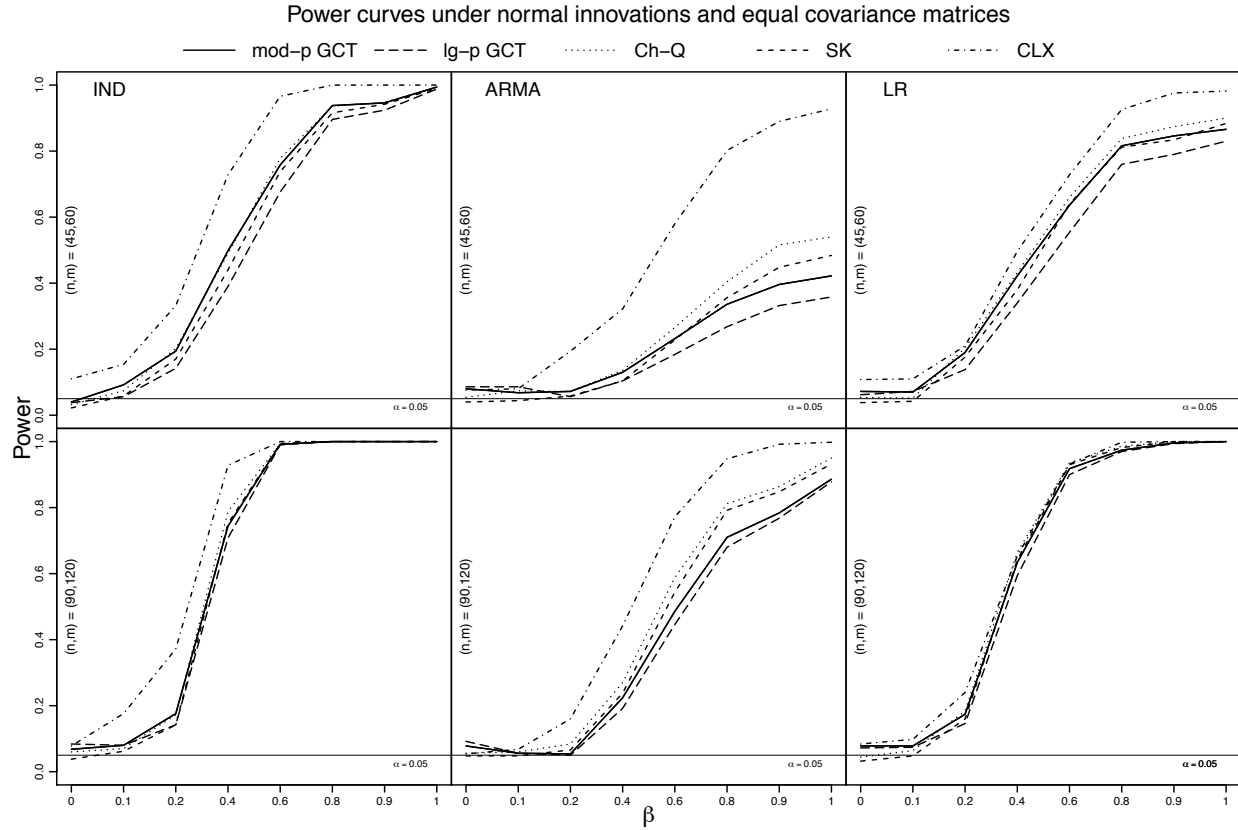

Figure S.1: Power curves at sample sizes  $(n, m) = (45, 60), (90, 120)$  for the moderate- and large- $p$  GCT, Ch-Q, SK, and CLX tests against the proportion of nonzero mean differences  $\beta$  under IND, ARMA, and LR dependence (left to right) with Normal(0, 1) innovations and  $\Sigma_1 = \Sigma_2$ . Based on  $S = 500$  simulations.

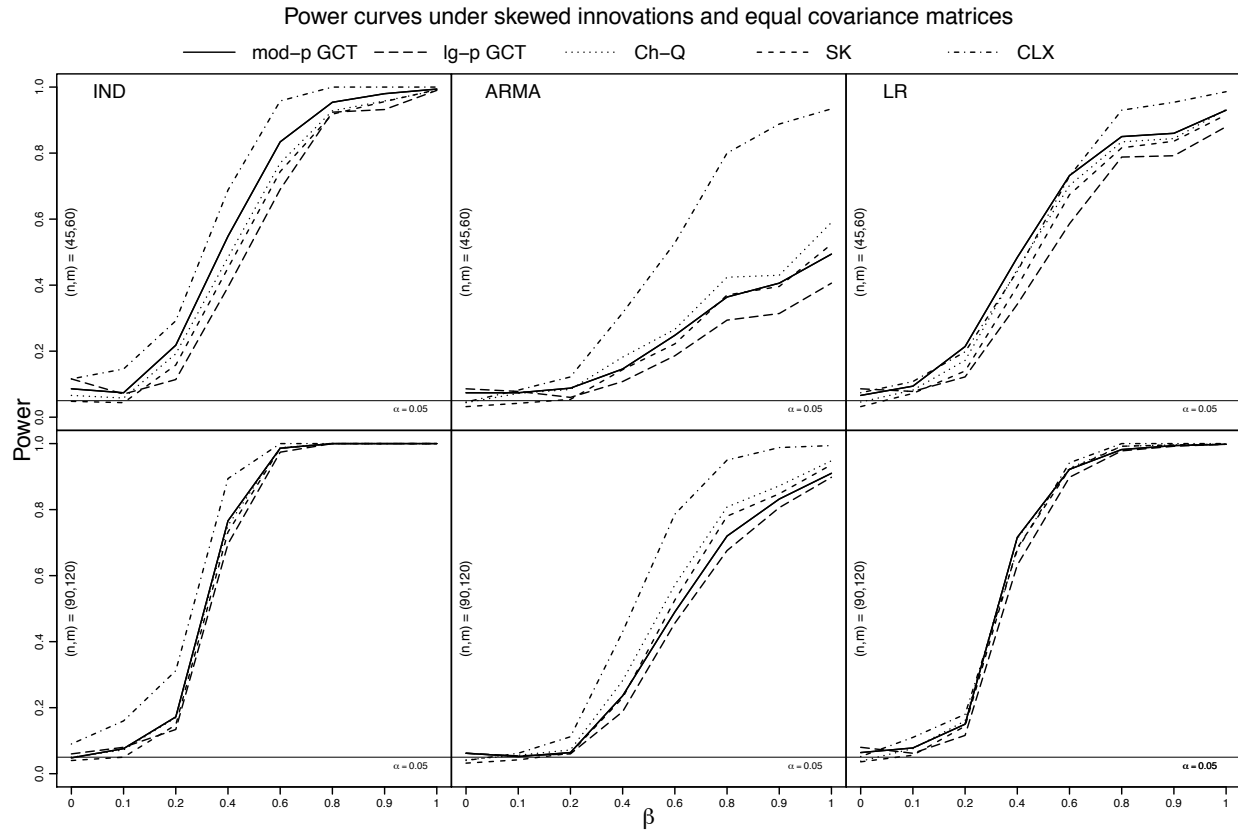

Figure S.2: Power curves at sample sizes  $(n, m) = (45, 60), (90, 120)$  for the moderate- and large- $p$  GCT, Ch-Q, SK, and CLX tests against the proportion of nonzero mean differences  $\beta$  under IND, ARMA, and LR dependence (left to right) with centered gamma(4, 2) innovations and  $\Sigma_1 = \Sigma_2$ . Based on  $S = 500$  simulations.

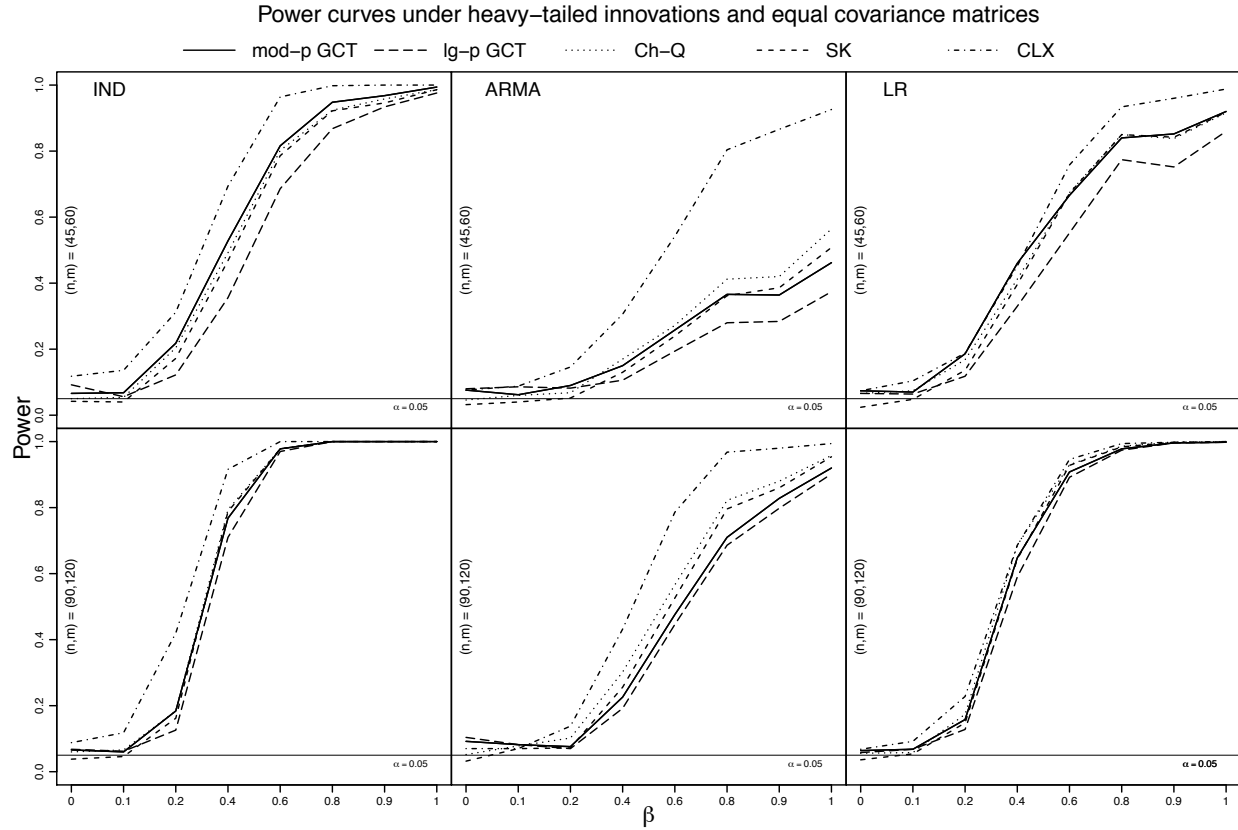

Figure S.3: Power curves at sample sizes  $(n, m) = (45, 60), (90, 120)$  for the moderate- and large- $p$  GCT, Ch-Q, SK, and CLX tests against the proportion of nonzero mean differences  $\beta$  under IND, ARMA, and LR dependence (left to right) with double Pareto(16.5,8) innovations and  $\Sigma_1 = \Sigma_2$ . Based on  $S = 500$  simulations.

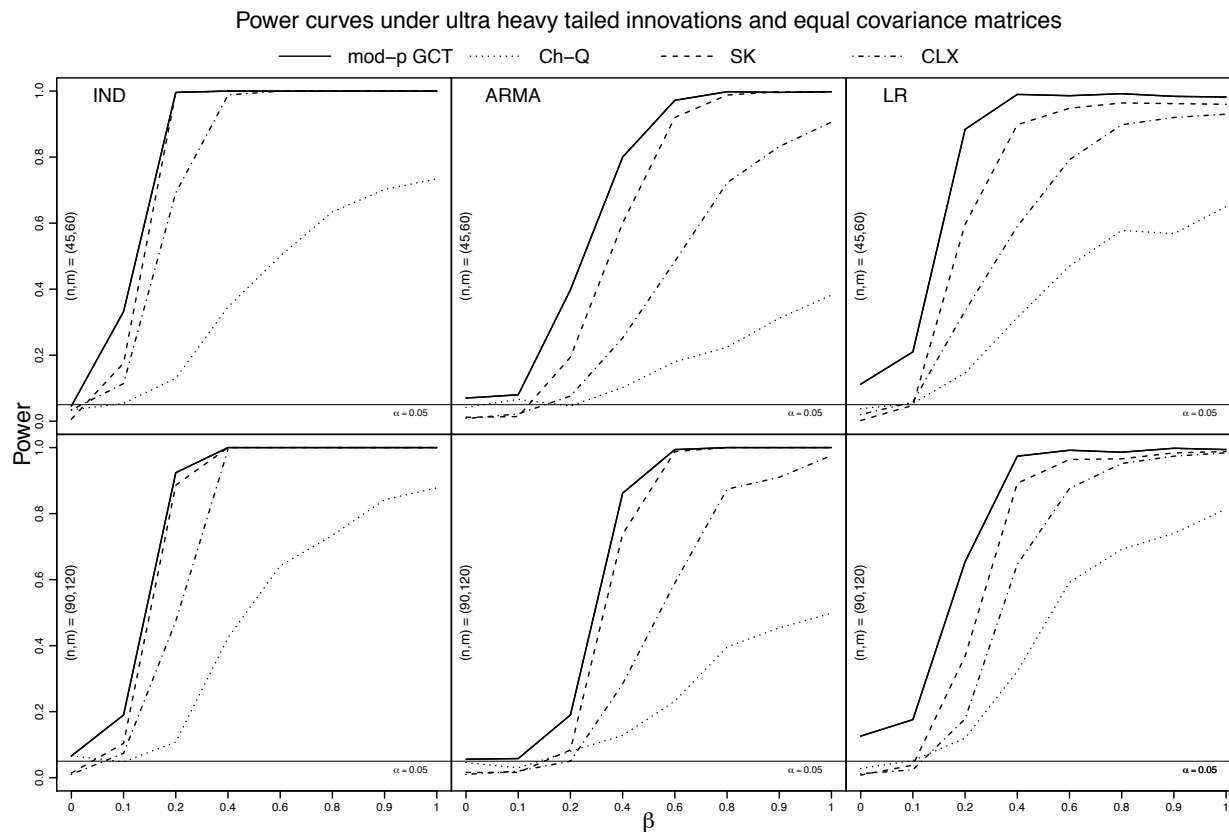

Figure S.4: Power curves at sample sizes  $(n, m) = (45, 60), (90, 120)$  for the large- $p$  GCT, Ch-Q, SK, and CLX tests against the proportion of nonzero mean differences  $\beta$  under IND, ARMA, and LR dependence (left to right) with double Pareto(1.5,1) innovations and  $\Sigma_1 = \Sigma_2$ . Based on  $S = 500$  simulations.

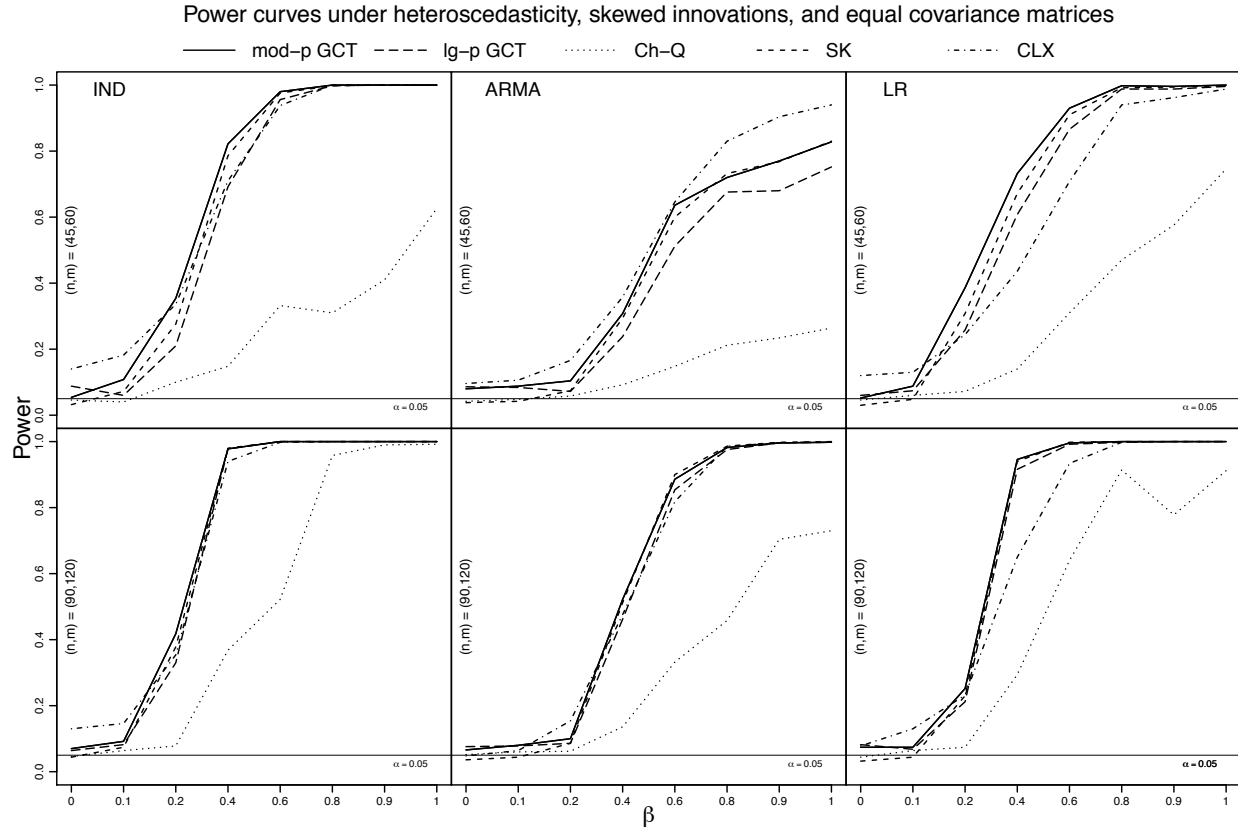

Figure S.5: Power curves at sample sizes  $(n, m) = (45, 60), (90, 120)$  for the moderate- and large- $p$  GCT, Ch-Q, SK, and CLX tests against the proportion of nonzero mean differences  $\beta$  under IND, ARMA, and LR dependence (left to right) with heteroscedastic centered gamma(4, 2) innovations and  $\Sigma_1 = \Sigma_2$ . Based on  $S = 500$  simulations.

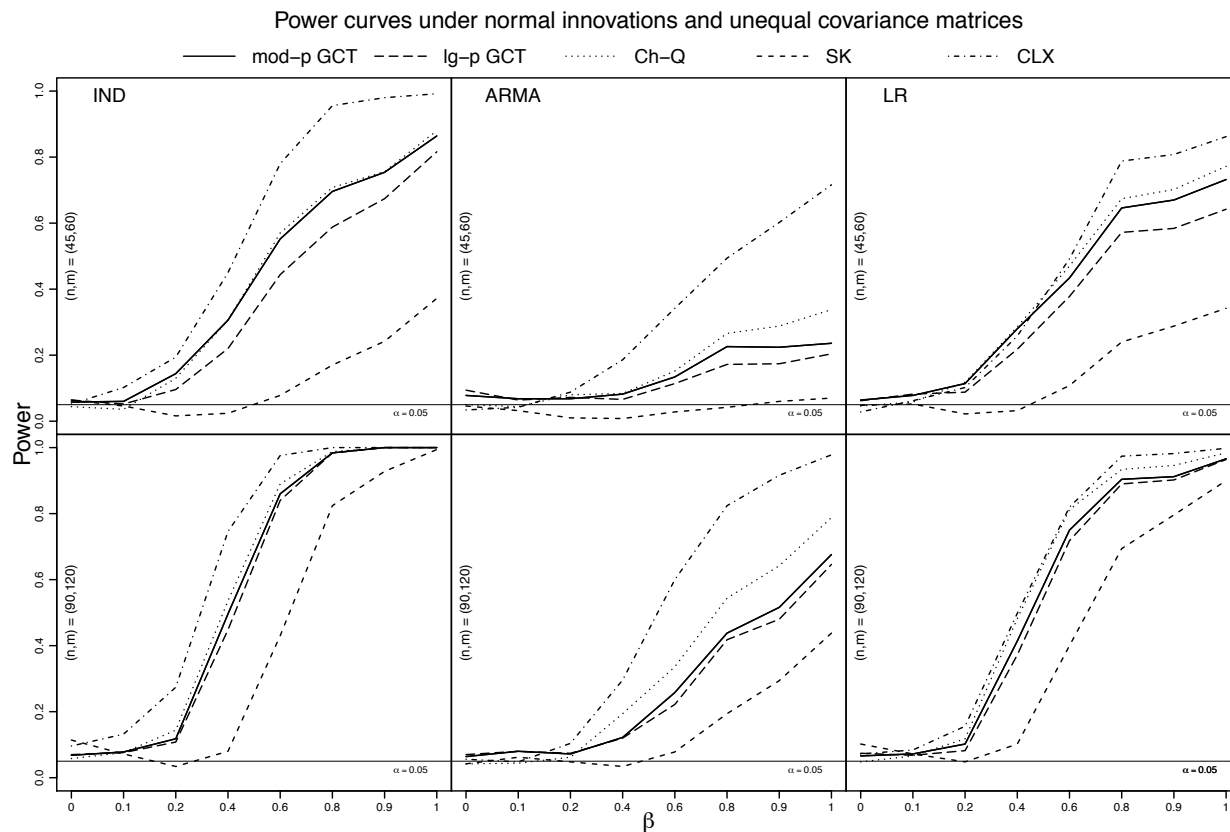

Figure S.6: Power curves at sample sizes  $(n, m) = (45, 60), (90, 120)$  for the moderate- and large- $p$  GCT, Ch-Q, SK, and CLX tests against the proportion of nonzero mean differences  $\beta$  under IND, ARMA, and LR dependence (left to right) with Normal(0, 1) innovations and  $\Sigma_2 = 2\Sigma_1$ . Based on  $S = 500$  simulations.

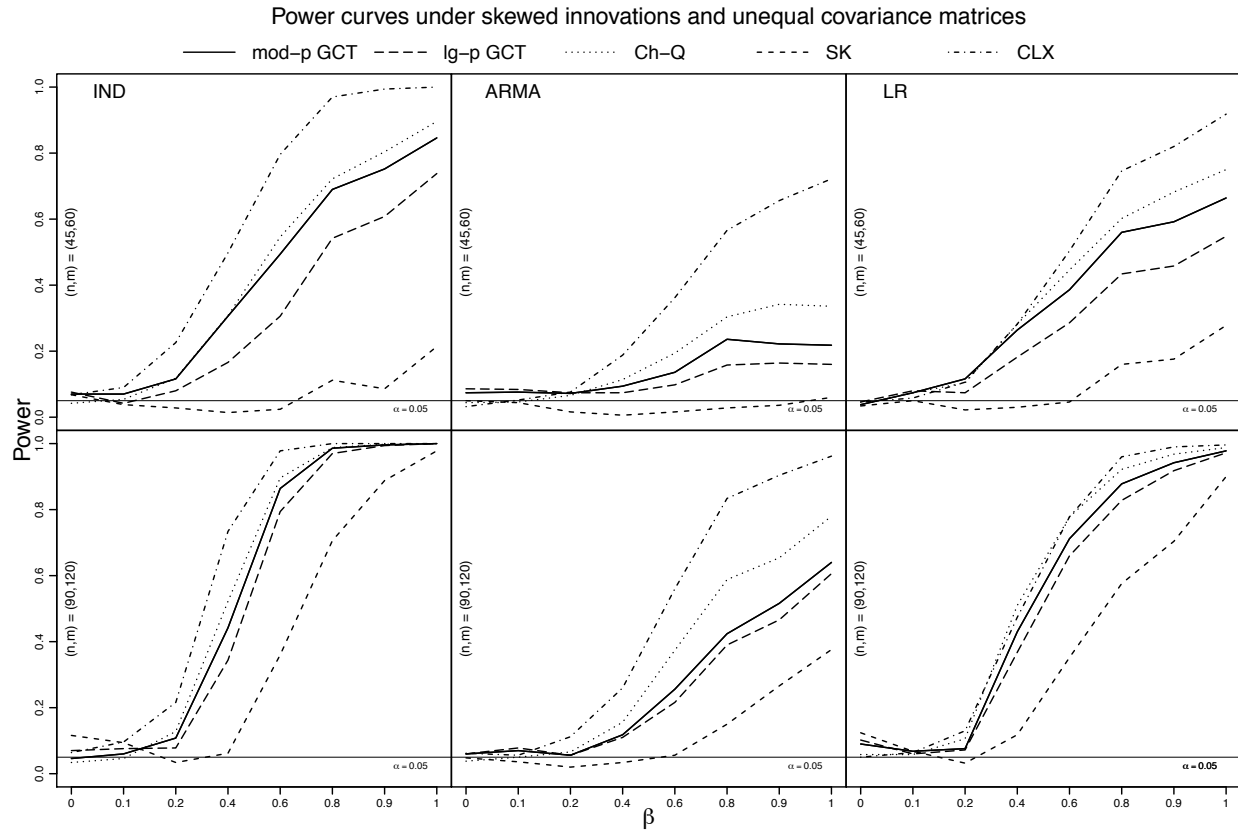

Figure S.7: Power curves at sample sizes  $(n, m) = (45, 60), (90, 120)$  for the moderate- and large- $p$  GCT, Ch-Q, SK, and CLX tests against the proportion of nonzero mean differences  $\beta$  under IND, ARMA, and LR dependence (left to right) with centered gamma(4, 2) innovations and  $\Sigma_2 = 2\Sigma_1$ . Based on  $S = 500$  simulations.



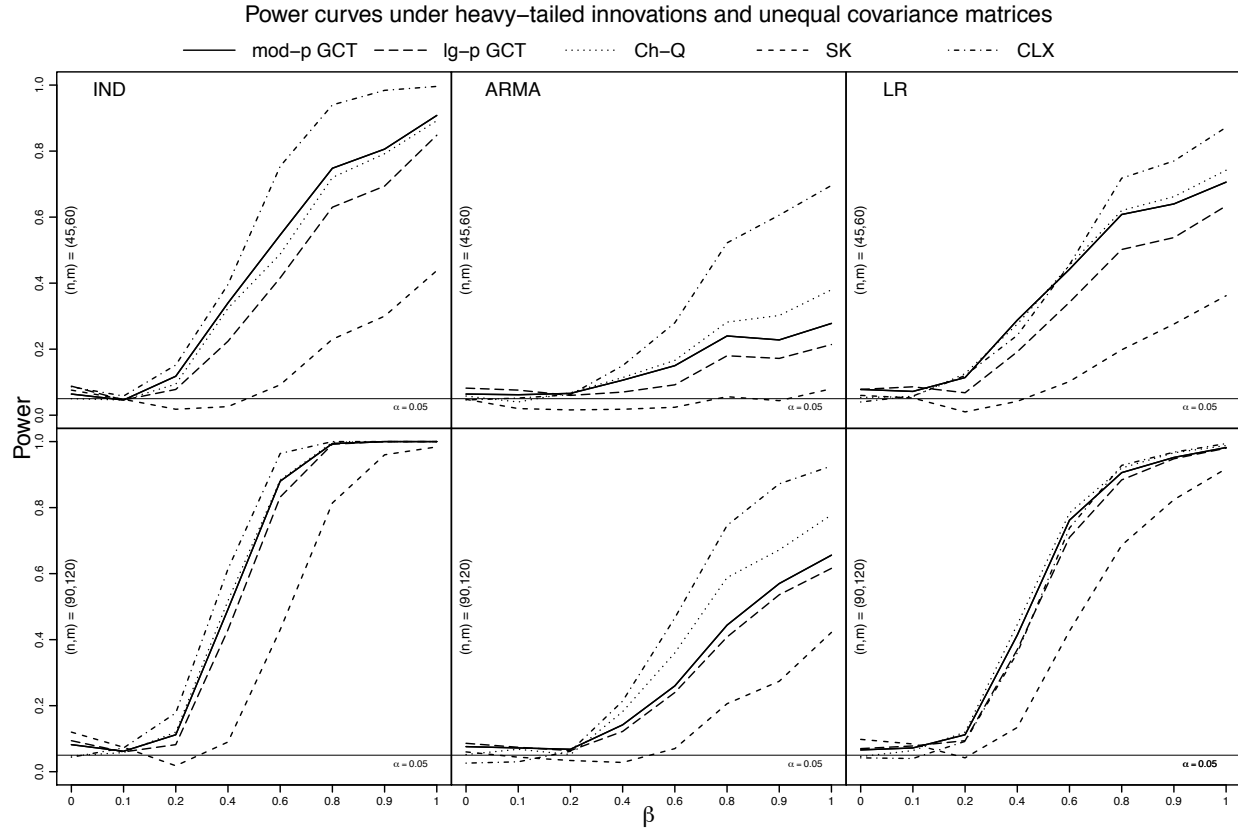

Figure S.8: Power curves at sample sizes  $(n, m) = (45, 60), (90, 120)$  for the moderate- and large- $p$  GCT, Ch-Q, SK, and CLX tests against the proportion of nonzero mean differences  $\beta$  under IND, ARMA, and LR dependence (left to right) with double Pareto(16.5,8) innovations and  $\Sigma_2 = 2\Sigma_1$ . Based on  $S = 500$  simulations.

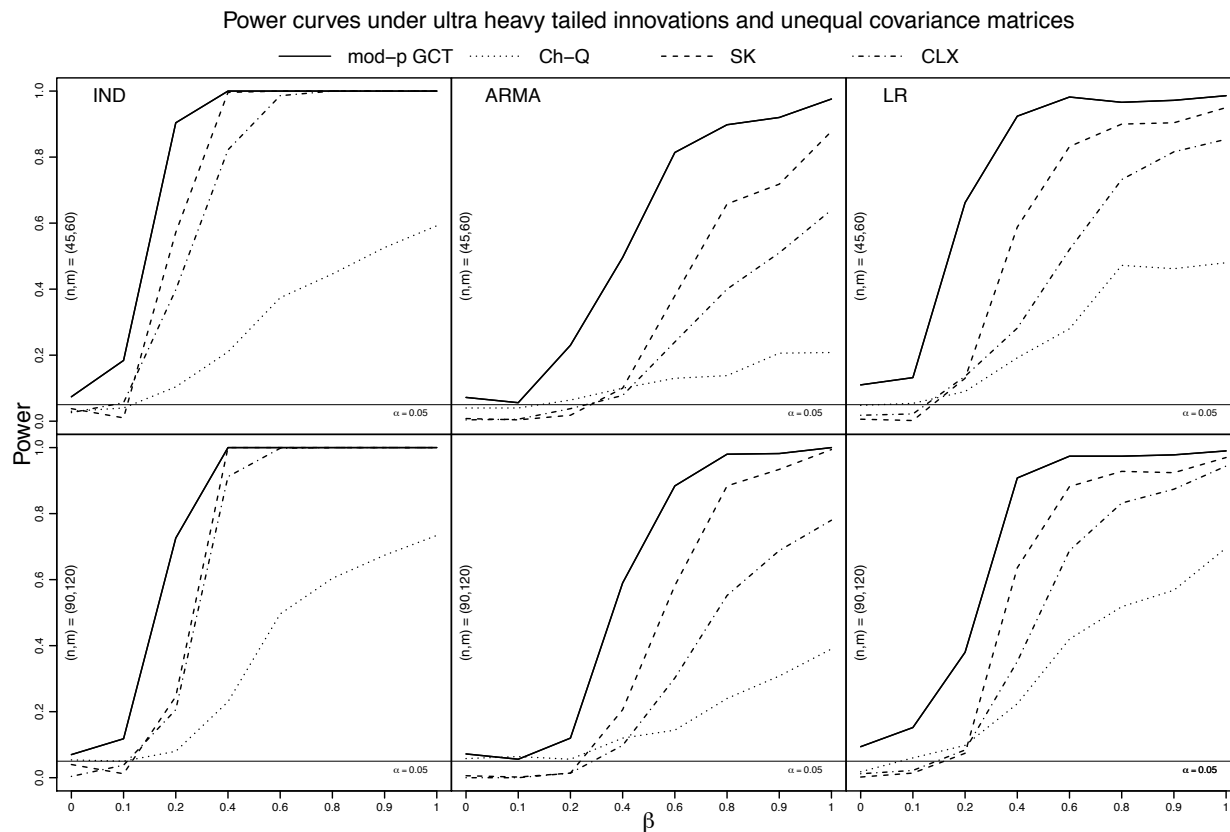

Figure S.9: Power curves at sample sizes  $(n, m) = (45, 60), (90, 120)$  for the large- $p$  GCT, Ch-Q, SK, and CLX tests against the proportion of nonzero mean differences  $\beta$  under IND, ARMA, and LR dependence (left to right) with double Pareto(1.5,1) innovations and  $\Sigma_2 = 2\Sigma_1$ . Based on  $S = 500$  simulations.

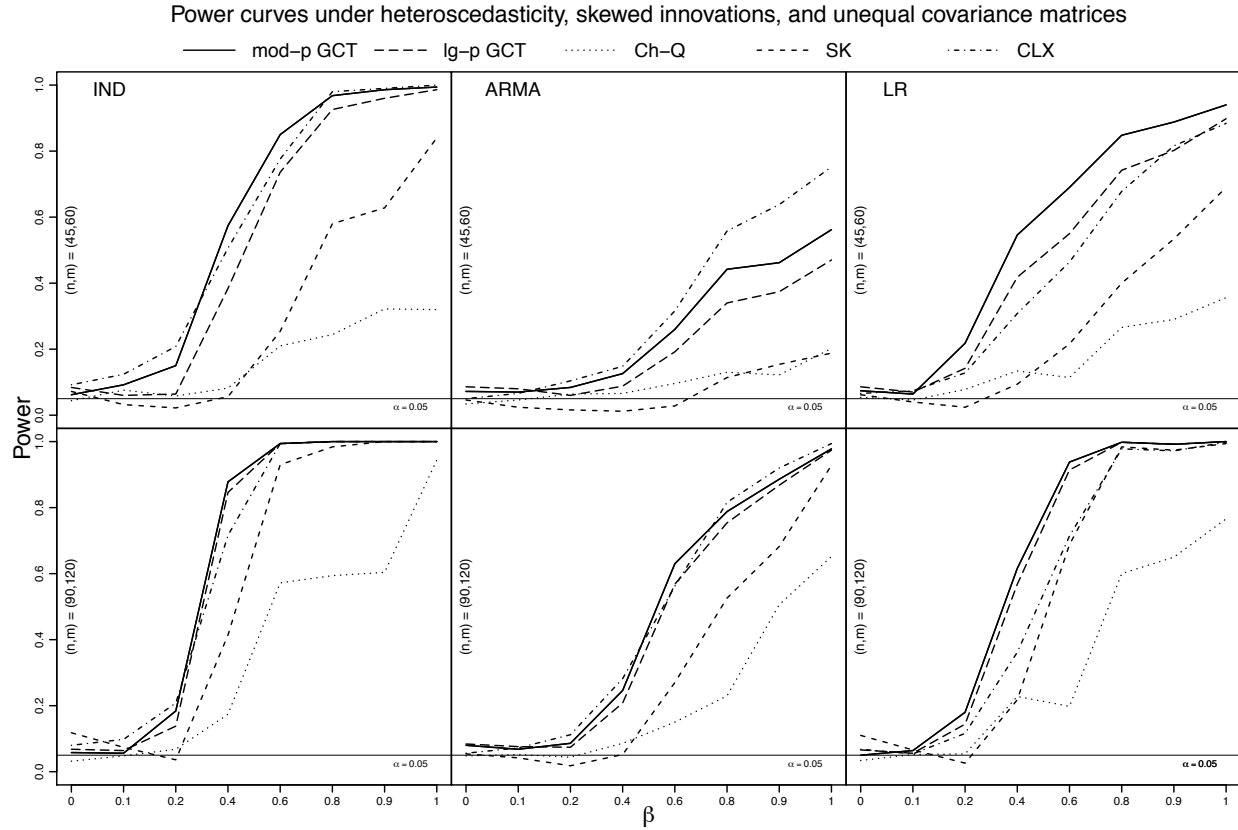

Figure S.10: Power curves at sample sizes  $(n, m) = (45, 60), (90, 120)$  for the moderate- and large- $p$  GCT, Ch-Q, SK, and CLX tests against the proportion of nonzero mean differences  $\beta$  under IND, ARMA, and LR dependence (left to right) with heteroscedastic centered gamma(4, 2) innovations and  $\Sigma_2 = 2\Sigma_1$ . Based on  $S = 500$  simulations.
